# Supplementary material
Source: publisher site journal article supplement (https://www.dovepress.com/article/373134)
Supplement: Supplementary file 1 [file get_supplementary_file.php]

**Appendix**

("helplessness, learned"[MeSH Terms] OR "learned helplessness"[Title/Abstract] OR "helplessness"[Title/Abstract] OR "hopelessness"[Title/Abstract] OR "powerlessness"[Title/Abstract]) AND ("renal dialysis"[MeSH Terms] OR (("dialysance"[All Fields] OR "dialysances"[All Fields] OR "dialysation"[All Fields] OR "dialysator"[All Fields] OR "dialysators"[All Fields] OR "dialyse"[All Fields] OR "dialysed"[All Fields] OR "dialyser"[All Fields] OR "dialysers"[All Fields] OR "dialysing"[All Fields] OR "dialysis solutions"[Pharmacological Action] OR "dialysis solutions"[MeSH Terms] OR ("Dialysis"[All Fields] AND "solutions"[All Fields]) OR "dialysis solutions"[All Fields] OR "dialysate"[All Fields] OR "dialysates"[All Fields] OR "dialyzate"[All Fields] OR "dialyzates"[All Fields] OR "Dialysis"[MeSH Terms] OR "Dialysis"[All Fields] OR "Dialyses"[All Fields] OR "dialyzability"[All Fields] OR "dialyzable"[All Fields] OR "dialyzation"[All Fields] OR "dialyze"[All Fields] OR "dialyzed"[All Fields] OR "dialyzer"[All Fields] OR "dialyzer s"[All Fields] OR "dialyzers"[All Fields] OR "dialyzing"[All Fields] OR "renal dialysis"[MeSH Terms] OR ("Renal"[All Fields] AND "Dialysis"[All Fields]) OR "renal dialysis"[All Fields]) AND "Renal"[Title/Abstract]) OR "renal dialyses"[Title/Abstract] OR "dialysis renal"[Title/Abstract] OR "Hemodialysis"[Title/Abstract] OR "Hemodialyses"[Title/Abstract] OR "dialysis extracorporeal"[Title/Abstract] OR (("dialysance"[All Fields] OR "dialysances"[All Fields] OR "dialysation"[All Fields] OR "dialysator"[All Fields] OR "dialysators"[All Fields] OR "dialyse"[All Fields] OR "dialysed"[All Fields] OR "dialyser"[All Fields] OR "dialysers"[All Fields] OR "dialysing"[All Fields] OR "dialysis solutions"[Pharmacological Action] OR "dialysis solutions"[MeSH Terms] OR ("Dialysis"[All Fields] AND "solutions"[All Fields]) OR "dialysis solutions"[All Fields] OR "dialysate"[All Fields] OR "dialysates"[All Fields] OR "dialyzate"[All Fields] OR "dialyzates"[All Fields] OR "Dialysis"[MeSH Terms] OR "Dialysis"[All Fields] OR "Dialyses"[All Fields] OR "dialyzability"[All Fields] OR "dialyzable"[All Fields] OR "dialyzation"[All Fields] OR "dialyze"[All Fields] OR "dialyzed"[All Fields] OR "dialyzer"[All Fields] OR "dialyzer s"[All Fields] OR "dialyzers"[All Fields] OR "dialyzing"[All Fields] OR "renal dialysis"[MeSH Terms] OR ("Renal"[All Fields] AND "Dialysis"[All Fields]) OR "renal dialysis"[All Fields]) AND "Extracorporeal"[Title/Abstract]) OR "extracorporeal dialyses"[Title/Abstract] OR "extracorporeal dialysis"[Title/Abstract])
